# Supplementary material for: A SEL1L Mutation Links a Canine Progressive Early-Onset Cerebellar Ataxia to the Endoplasmic Reticulum–Associated Protein Degradation (ERAD) Machinery
Source: PLoS Genet. 2012 Jun 14;8(6):e1002759. doi: 10.1371/journal.pgen.1002759 (PMC3375262; doi:10.1371/journal.pgen.1002759)
Supplement: Table S6 — Primers for quantitative PCR. (XLSX) [file pgen.1002759.s006.xlsx]

## Sheet: Table S6
Table S6. Primers for quantitative PCR.
Primer ID	mRNA reference	Forward primer sequence 5' > 3'	Reverse primer sequence 5' > 3'	Product size (bp)	Notes
SEL1L	XM_537530.2	CTCGGATGAAGAAGGCAGTC	GCTGTGCTGTGGTCCTTTAC	87	Ataxia-locus gene
STON2	XM_547937.3	GTGATCGCTACCCACCAGTC	GATGACAGTGCTGGGAGATG	104	Ataxia-locus gene
CEP128	XM_547936.3	GACAGGCGGGTGCTGTAG	TCCTCCCTCCTGAGTGTCTC	96	Ataxia-locus gene
ATF6	XM_545777.3	TCTCCTCAGTCGGTGGACTC	GGGAGACATCTGGGAAGAAG	84	ER-stress marker
CHOP	XM_844109.2	GGGGTACCTGTGTTTCACC	TCAGTCAGCCAAGCCAGAG	91	ER-stress marker
DNAJB11	XM_535834.3	GCTCAGGAGAAATTCCAGGAC	AATCCCTCTTCACCGTAAGTATC	95	ER-stress marker
DNAJC3	XM_534166.4	AAGCACTTGATGCTTTCGAG	GTTCCCGTAGTTCTGCATCC	99	ER-stress marker
HERPUD1	XM_845948.2	CCTGGTTCCAGCAGATGTATG	TCTCCTGTGCACTTGGTGAG	99	ER-stress marker
HSPA5	XM_858292.2	CGTCTGTGCAACAGGACATC	TGCCCACCTCCAATATCAAC	91	ER-stress marker
EDEM1	XM_533753.3	CAAAGATTCCACCGTCCAAG	AAGGGCTGCTTGGAGTCAG	96	ER-stress marker
XBP1s	XM_849540.2	GGGATGGATACCCTGGCTAC	CACCTGCTGCGGACTCAG	97	ER-stress marker (spliced XBP1)
XBP1u	XM_849540.2	ACTGAAGAGGAGGCGGAGAC	GCAGAGGTGCACGTAGTCTG	97	ER-stress marker (unspliced XBP1)
HRD1	XM_540867.3	CAGCTGGTGTTTGGCTTTG	GGGTTCTCACTCTGGAGGTC	101	ERAD-component
GAPDH	NM_001003142.1	CATTGCCCTCAATGACCAC	TCCTTGGAGGCCATGTAGAC	105	House-keeping control
YWHAZ	XM_843951.3	GATGGCTCGAGAATACAGAGAG	CTCTGCTTGTGAAGCATTGG	109	House-keeping control
